# Supplementary material for: Stress Responses Elicited by Glucose Withdrawal in Aspergillus fumigatus
Source: MDPI journal article supplement (doi:10.3390/jof8111226), 2022-11-21
Supplement: s1 [file s1]

| Gene ID                           | Number of reads <sup>a</sup>                        |                                 |                                 |                                         |
|-----------------------------------|-----------------------------------------------------|---------------------------------|---------------------------------|-----------------------------------------|
|                                   | Carbon-starved<br>(23.2 ± 2.4 million) <sup>b</sup> | Peptone<br>(21.4 ± 3.5 million) | Glucose<br>(20.3 ± 1.6 million) | Glucose+peptone<br>(19.4 ± 3.0 million) |
| Afu1g00480 (11/1092) <sup>c</sup> | 86 ± 9                                              | 305 ± 136                       | 1 ± 1                           | 5 ± 1                                   |
| Afu8g04070 (10/1077)              | 59 ± 7                                              | 229 ± 123                       | 2 ± 1                           | 2 ± 1                                   |
| both                              | 1023 ± 92                                           | 3390 ± 1657                     | 27 ± 8                          | 38 ± 9                                  |
| Afu1g00470 (17/1500)              | 304 ± 22                                            | 350 ± 49                        | 156 ± 62                        | 208 ± 45                                |
| Afu8g04080 (17/1500)              | 766 ± 68                                            | 1006 ± 198                      | 374 ± 76                        | 601 ± 84                                |
| both                              | 979 ± 131                                           | 1207 ± 197                      | 418 ± 70                        | 742 ± 91                                |
| Afu1g00460 (21/1524)              | 2681 ± 193                                          | 5007 ± 1077                     | 1186 ± 133                      | 3842 ± 581                              |
| Afu8g04090 (126/1629)             | 1169 ± 119                                          | 2127 ± 430                      | 503 ± 76                        | 1538 ± 274                              |
| both                              | 9822 ± 236                                          | 24172 ± 10238                   | 2060 ± 446                      | 1933 ± 291                              |
| Afu1g00450 (10/1293)              | 117 ± 5                                             | 656 ± 422                       | 5 ± 5                           | 4 ± 2                                   |
| Afu8g04100 (10/1293)              | 768 ± 54                                            | 3467 ± 1851                     | 18 ± 10                         | 12 ± 11                                 |
| both                              | 1371 ± 156                                          | 6397 ± 3477                     | 38 ± 20                         | 28 ± 11                                 |
| Afu1g00440 (26/1533)              | 627 ± 49                                            | 1609 ± 687                      | 80 ± 12                         | 90 ± 12                                 |
| Afu8g04110 (26/1533)              | 3819 ± 127                                          | 10189 ± 5280                    | 168 ± 29                        | 114 ± 15                                |
| both                              | 1585 ± 29                                           | 4124 ± 2050                     | 82 ± 15                         | 81 ± 13                                 |
| Afu1g00420 (21/1614)              | 15 ± 4                                              | 20 ± 9                          | 32 ± 9                          | 23 ± 5                                  |
| Afu8g04120 (63/1656)              | 12745 ± 373                                         | 29537 ± 10778                   | 3290 ± 379                      | 5963 ± 858                              |
| both                              | 15 ± 3                                              | 16 ± 12                         | 24 ± 2                          | 24 ± 5                                  |
| Afu1g00410 (137/2550)             | 709 ± 30                                            | 1296 ± 306                      | 278 ± 50                        | 151 ± 43                                |
| Afu8g04130 (245/2658)             | 9915 ± 142                                          | 24580 ± 9582                    | 2336 ± 218                      | 5427 ± 789                              |
| both                              | 544 ± 6                                             | 927 ± 212                       | 237 ± 39                        | 125 ± 29                                |

**Table S5** Transcriptional activity of the Afu8g04070-Afu8g04130 and Afu1g00410-Afu1g00480 gene sets according to the RNA sequencing data.

<sup>a</sup> - Mean ± SD of reads that can be aligned only to one of the two genes or to both genes calculated from the three parallel samples.

<sup>b</sup> – Mean ± SD of reads aligned to the transcript sequences in the three parallel samples.

<sup>c</sup> – Number of unique nucleotides in the transcript/length of the transcript. Transcript sequences were downloaded from FungiDB (<https://fungidb.org/fungidb/app>).
