# Supplementary material for: Stress Responses Elicited by Glucose Withdrawal in Aspergillus fumigatus
Source: MDPI journal article supplement (doi:10.3390/jof8111226), 2022-11-21
Supplement: s1 [file s1]

**Table S1** Primer pairs and *Aspergillus fumigatus* genomes used in the study.

*Primer pairs used in RT-qPCR assays*

Afu1g04260

Forward:5'-CGTCTTTGTACCAGTGTC-3'

Reverse:5'-CATAGCTCTGTGACGTTC-3'

Afu1g00440

Forward:5'-GATGAAGAACCCTACCTG-3'

Reverse:5'-CTGTTGAGAGACCAGGTAC-3'

Afu1g00450

Forward:5'-GTGACTTCATACTTGCCTAC-3'

Reverse:5'-CTCTTTGCCATAA CACTC-3'

Afu1g12940

Forward:5'-GCCTTTGGACTTGTCTGCTC-3'

Reverse:5'-GTCTGTCCCAAGGAGCTCTG-3'

Afu1g14550

Forward:5'-CAGAAGAAAGCGGCGGAAG-3'

Reverse:5'-AGGGTCGTGTTGAAAGCATC-3'

Afu2g07680

Forward:5'-TCTTCTGTGTGTTGGGTTTGG-3'

Reverse:5'-TTCTGGTGGAGGTAGTTGAG-3'

Afu3g11280

Forward:5'-GGGTGGTTACAAGTCTATC-3'

Reverse:5'-CAACTCTCAGAAACACCTC-3'

Afu4g13580

Forward:5'-GCGATACAGTCTACTTCG-3'

Reverse:5'-AGAGTGAAGAGAGCCATC-3'

Afu5g03800

Forward:5'-TTGACTGGCGGCACATTC-3'

Reverse:5'-TGGAGGGAGGCTTGGTTTC-3'

Afu5g03920

Forward:5'-ATTCCACCACGACCAAACC-3'

Reverse:5'-CACCGATACCTCCTTCTCCAAC-3'

Afu5g11260

Forward:5'-GAGACCACATCATCCACCG-3'

Reverse:5'-TTCAAGTTCAGACACGCCAG-3'

*A. fumigatus* genomes listed by their NCBI (<https://www.ncbi.nlm.nih.gov/home/genomes/>)  
accession number analyzed in the study

DRR015087

DRR015088

DRR015089

DRR015092

DRR015093

DRR015094

DRR015095

DRR015096

DRR015097

DRR015098

DRR015099

DRR015100

DRR015101

DRR015102

DRR015105

DRR015106

DRR015107

DRR015108

DRR015109

DRR015110

DRR015111

DRR015112

DRR017535

DRR017536

DRR017537

DRR017538

DRR017539

DRR017540

DRR017541

DRR017542  
DRR017543  
DRR017544  
DRR017545  
DRR017546  
DRR017547  
DRR017548  
DRR017549  
DRR017550  
DRR017551  
DRR017552  
DRR017553  
DRR017554  
DRR017555  
DRR017556  
DRR017557  
DRR017558  
DRR017559  
DRR017560  
DRR017561  
DRR022915  
DRR022916  
DRR022917  
DRR022918  
DRR022919  
DRR022920  
DRR022921  
DRR022922  
DRR022923  
DRR022924  
DRR022925  
DRR022926  
DRR022927  
DRR146814

DRR290036  
DRR295873  
DRR295874  
DRR295875  
ERR2863830  
ERR2864483  
ERR2864484  
ERR2864485  
ERR769499  
ERR769500  
ERR769501  
ERR769502  
ERR769503  
ERR769504  
ERR769505  
ERR769506  
ERR769507  
ERR769508  
ERR769509  
ERR769510  
ERR769511  
ERR769512  
ERR769513  
ERR769514  
ERR769515  
ERR769516  
ERR769517  
ERR769518  
ERR769519  
ERR769520  
ERR769521  
SRR10592629  
SRR10592630  
SRR10592631

SRR10592632  
SRR10592633  
SRR10997277  
SRR10997288  
SRR10997299  
SRR10997300  
SRR12894193  
SRR12894194  
SRR12894195  
SRR12894196  
SRR12894197  
SRR12894198  
SRR12894199  
SRR12894200  
SRR12894201  
SRR12894202  
SRR12894203  
SRR12894204  
SRR2954803  
SRR4002443  
SRR4002444  
SRR5676586  
SRR5676587  
SRR5676588  
SRR5676589  
SRR5676590  
SRR5676591  
SRR5676592  
SRR5676593  
SRR617720  
SRR617721  
SRR617722  
SRR617723  
SRR617724

SRR617725  
SRR617726  
SRR617727  
SRR617728  
SRR617729  
SRR617731  
SRR617733  
SRR617734  
SRR617735  
SRR617736  
SRR617737  
SRR617738  
SRR617739  
SRR617742  
SRR617744  
SRR617745  
SRR6434917  
SRR6434918  
SRR7418922  
SRR7418923  
SRR7418924  
SRR7418925  
SRR7418926  
SRR7418927  
SRR7418928  
SRR7418929  
SRR7418930  
SRR7418932  
SRR7418933  
SRR7418934  
SRR7418935  
SRR7418936  
SRR7418937  
SRR7418938

SRR7418939  
SRR7418940  
SRR7418941  
SRR7418942  
SRR7418943  
SRR7418944  
SRR7418945  
SRR7418946  
SRR7418947  
SRR7418948  
SRR7418949  
SRR8759697  
SRR8759698  
SRR8759699  
SRR8759700  
SRR8759701  
SRR8759702  
SRR8759703  
SRR8759704  
SRR8759705  
SRR8759706  
SRR8759707  
SRR8759708  
SRR8759709  
SRR9067511  
SRR9265315  
SRR9265316  
SRR9265317  
SRR9265318
